# Supplementary material for: Placental lactogens induce serotonin biosynthesis in a subset of mouse beta cells during pregnancy
Source: PubMed Central journal article supplement — Diabetologia. 2010 Oct 7;53(12):2589–99. doi: 10.1007/s00125-010-1913-7 (PMC2974930; doi:10.1007/s00125-010-1913-7), 2010-10-07
Supplement: 125_2010_1913_MOESM2_ESM.pdf [file 125_2010_1913_MOESM2_ESM.pdf]

## Electronic supplementary material

**ESM Table 1** Primers and probes for quantitative RT-PCR

| Primer/probe per gene | Sequence                                              |
|-----------------------|-------------------------------------------------------|
| <i>Tph1</i>           |                                                       |
| Forward primer        | 5'-TTCCAGGAGAATCATGTGAGC-3'                           |
| Probe                 | 5'-(6-FAM)TCAACTGTTCTCGGCTGATGTCGCAGTCA(TAMRA)-3'     |
| Reverse primer        | 5'-CATAACGTCTTCCTTCGCAGT-3'                           |
| <i>Ddc</i>            |                                                       |
| Forward primer        | 5'-CTAAAGGGCTCCAATGAGTTGAA-3'                         |
| Probe                 | 5'-(6-FAM)TCCACTTGGTTCCATGTCGTCTCCGAGACA(TAMRA)-3'    |
| Reverse primer        | 5'-TGATCTCTGAAGCAGCTCTG-3'                            |
| <i>Prlr</i>           |                                                       |
| Forward primer        | 5'-GCC TCC TGA ATG GAC AGT CAC-3'                     |
| Probe                 | 5'-(6-FAM)AGTCCTCCATCTGACCCAGGATTCCACCA(TAMRA)-3'     |
| Reverse primer        | 5'-TTGTAGTCTGGACATTCATAGGTGTT-3'                      |
| <i>Polr2a</i>         |                                                       |
| Forward primer        | 5'-GCA CCA CGT CCA ATG ATA TTG TG-3'                  |
| Probe                 | 5'-(6-FAM)CTT CCG CAC AGC CTC AAT GCC CAG T(TAMRA)-3' |
| Reverse primer        | 5'-GGA GAT GAC ATG GTA CAG TTC TCG-3'                 |
