# Supplementary material for: Placental lactogens induce serotonin biosynthesis in a subset of mouse beta cells during pregnancy
Source: PubMed Central journal article supplement — Diabetologia. 2010 Oct 7;53(12):2589–99. doi: 10.1007/s00125-010-1913-7 (PMC2974930; doi:10.1007/s00125-010-1913-7), 2010-10-07
Supplement: 125_2010_1913_MOESM3_ESM.pdf [file 125_2010_1913_MOESM3_ESM.pdf]

## Electronic supplementary material

**ESM Table 2** List of antibodies

| <b>Antibody</b>                      | <b>Catalogue number</b> | <b>Supplier</b>                              |
|--------------------------------------|-------------------------|----------------------------------------------|
| anti-TPH1                            | AB15570                 | Chemicon-Millipore, Billerica, MA, USA       |
| anti- $\beta$ -Actin                 | ab-6276-100             | Abcam, Cambridge, UK                         |
| anti-Phospho-STAT5                   | 9359                    | Cell signalling technology, Danvers, MA, USA |
| anti-STAT5                           | 9358                    | Cell signalling technology, Danvers, MA, USA |
| anti-Phospho-ERK1/2                  | 4370                    | Cell signalling technology, Danvers, MA, USA |
| anti-ERK1/2                          | 4695                    | Cell signalling technology, Danvers, MA, USA |
| anti-Phospho-AKT                     | 4060                    | Cell signalling technology, Danvers, MA, USA |
| anti-AKT                             | 4691                    | Cell signalling technology, Danvers, MA, USA |
| Anti-serotonin                       | ab16007                 | Abcam, Cambridge, UK                         |
| Anti-insulin                         | ab7842                  | Abcam, Cambridge, UK                         |
| Anti-serotonin ( YC5/45)             | sc-58031                | Santa Cruz, Santa Cruz, CA, USA              |
| anti-rabbit IgG, HRP-linked          | NA934V                  | GE Healthcare-Amersham, Diegem, Belgium      |
| Anti-mouse IgG , HRP-linked          | 715-036-150             | Jackson ImmunoResearch, West Grove, PA, USA  |
| anti-mouse IgG, AlexaFluor 555       | A31570                  | Invitrogen, Paisly, UK                       |
| anti-rabbit IgG, AlexaFluor 488      | A11008                  | Invitrogen, Paisly, UK                       |
| anti-guinea pig IgG, Fitc-conjugated | 706-096-148             | Jackson ImmunoResearch, West Grove, PA, USA  |

ERK, extracellular signal-regulated kinase; HRP, horseradish peroxidase
