# Supplementary figures and images for: Placental lactogens induce serotonin biosynthesis in a subset of mouse beta cells during pregnancy
Source: PubMed Central journal article supplement — Diabetologia. 2010 Oct 7;53(12):2589–99. doi: 10.1007/s00125-010-1913-7 (PMC2974930; doi:10.1007/s00125-010-1913-7), 2010-10-07

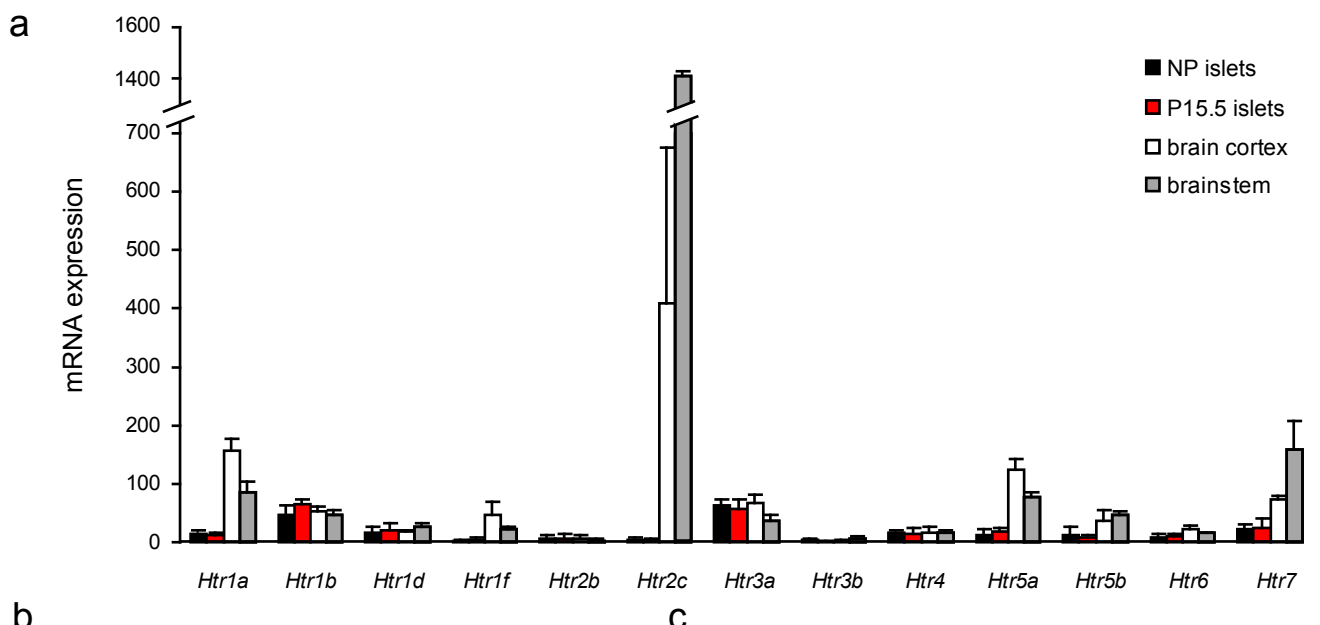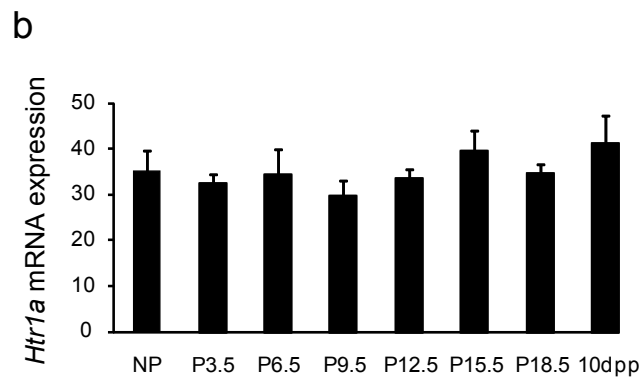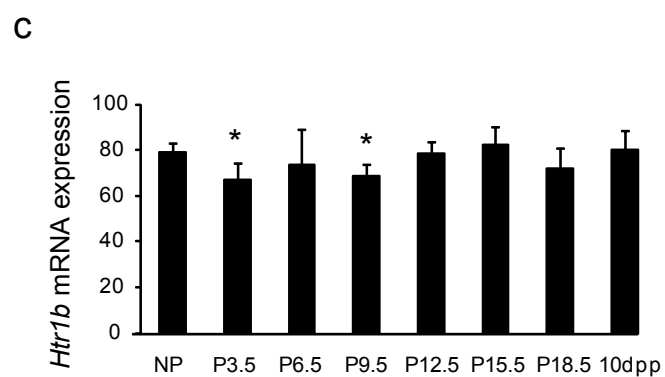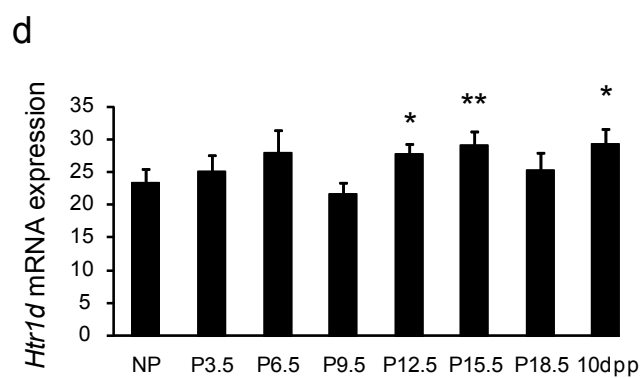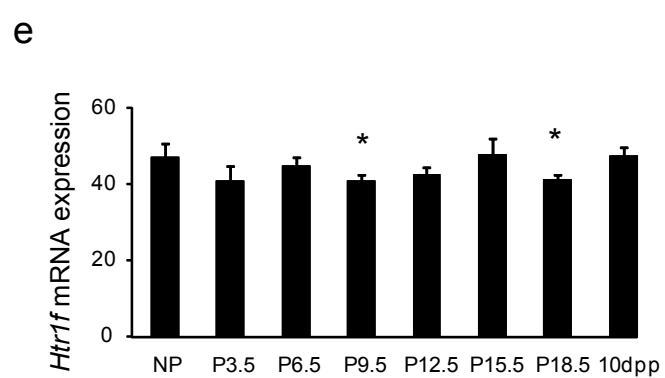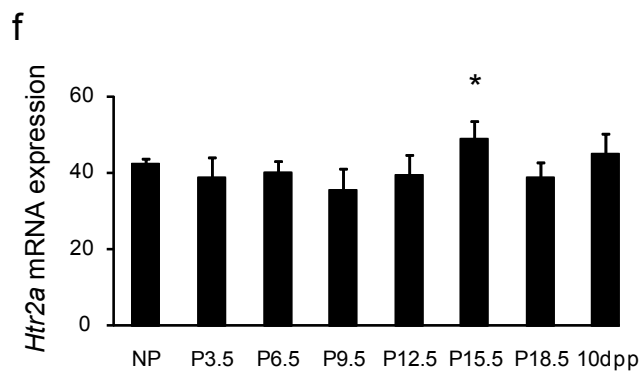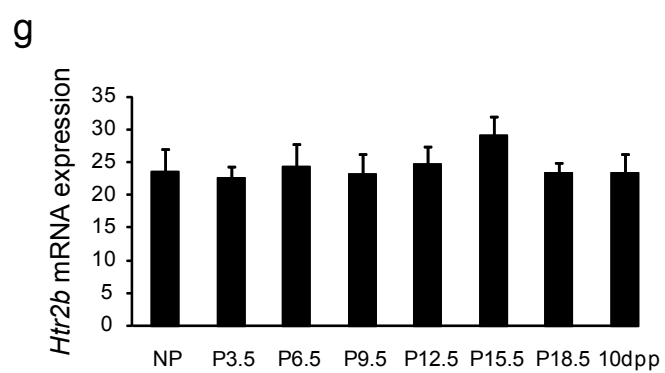

**d**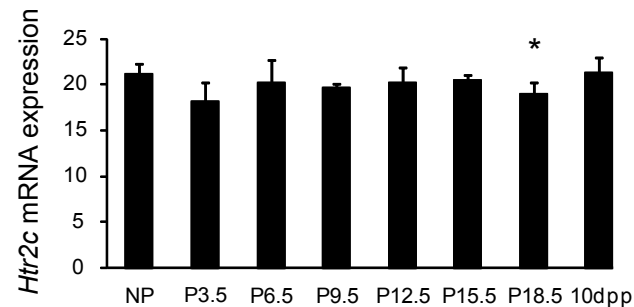**i**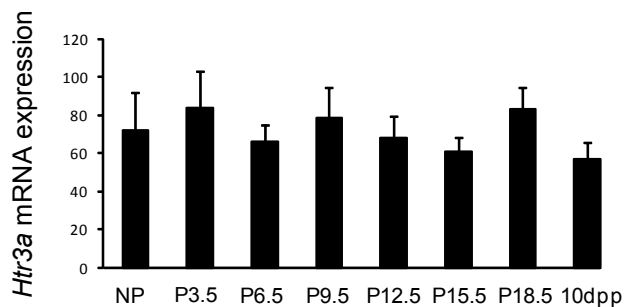**j**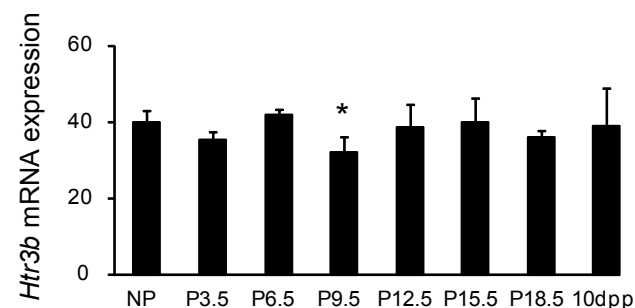**k**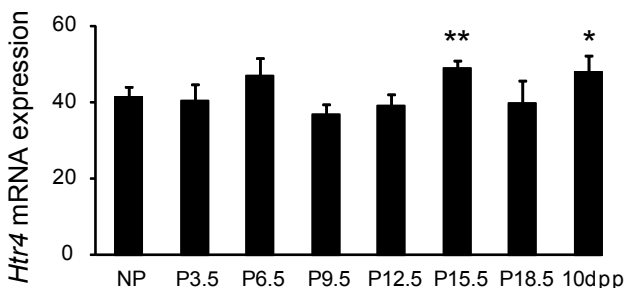**l**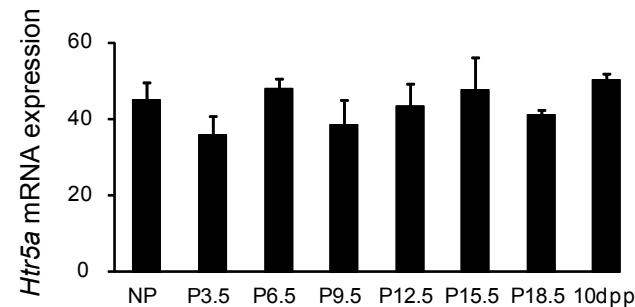**m**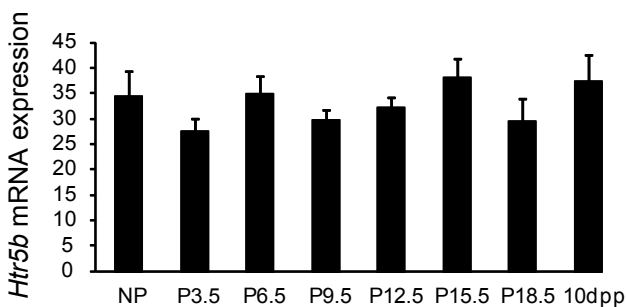**n**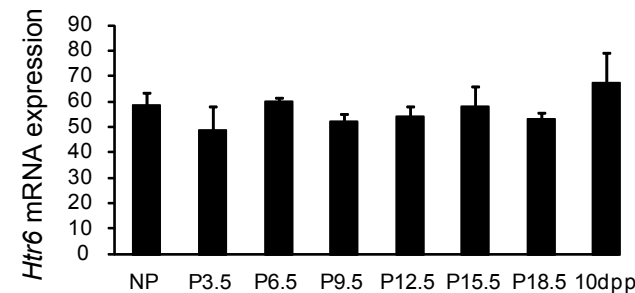**o**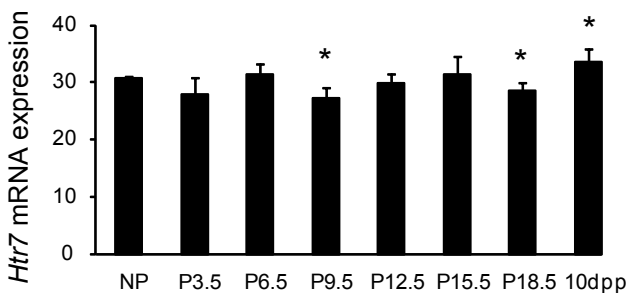

Supplement: 125_2010_1913_MOESM10_ESM.pdf [file 125_2010_1913_MOESM10_ESM.pdf]

% MKi67+ beta cells

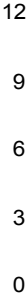

WT

*Tph1*-KO

Supplement: 125_2010_1913_MOESM11_ESM.pdf [file 125_2010_1913_MOESM11_ESM.pdf]

**a***Tph1* mRNA expression(normalised for *Po1r2a*)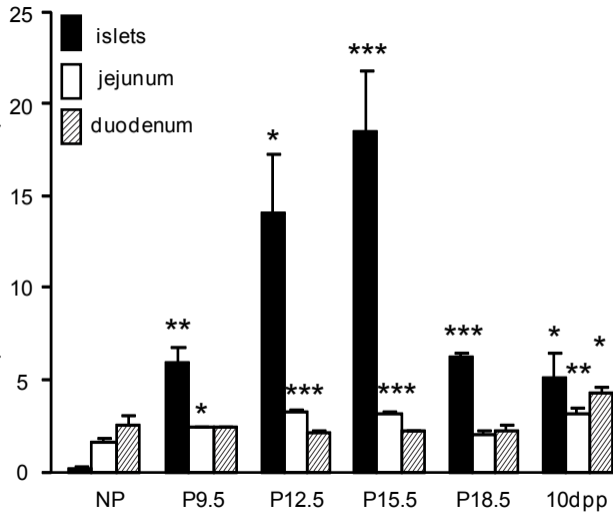**b***Ddc* mRNA expression(normalised for *Po1r2a*)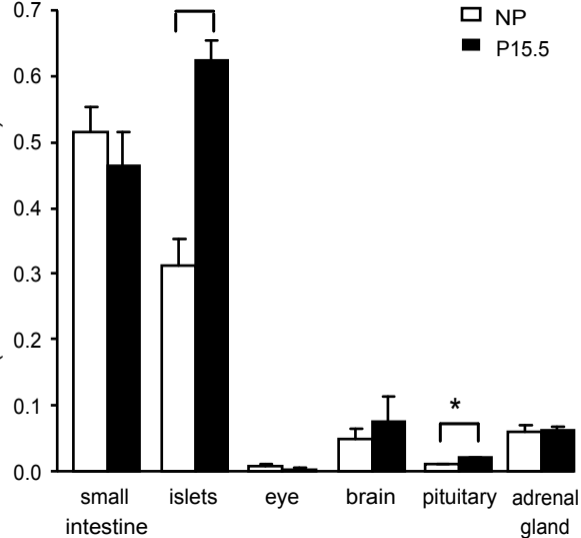

Supplement: 125_2010_1913_MOESM5_ESM.pdf [file 125_2010_1913_MOESM5_ESM.pdf]

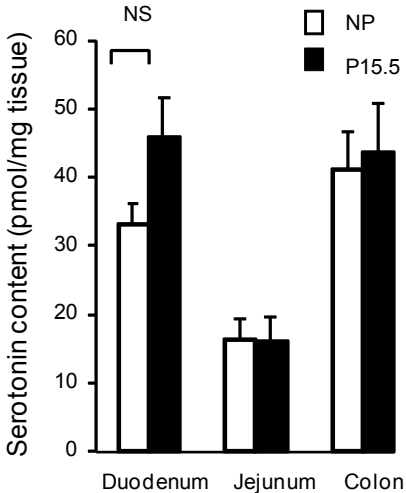

Supplement: 125_2010_1913_MOESM6_ESM.pdf [file 125_2010_1913_MOESM6_ESM.pdf]

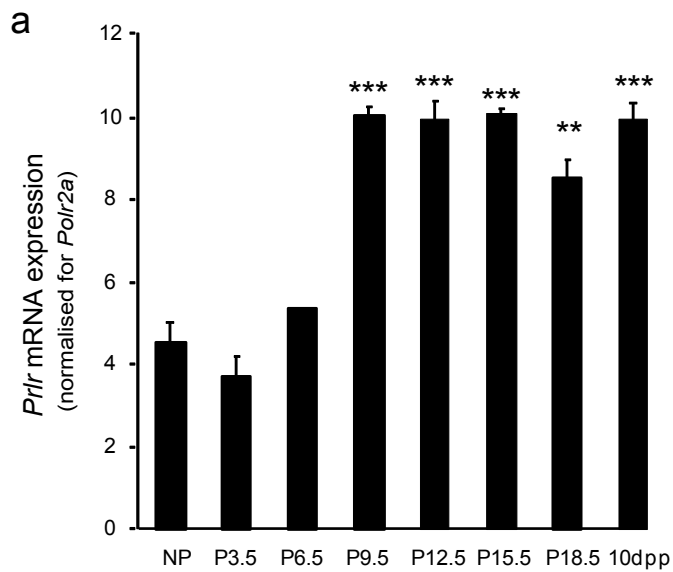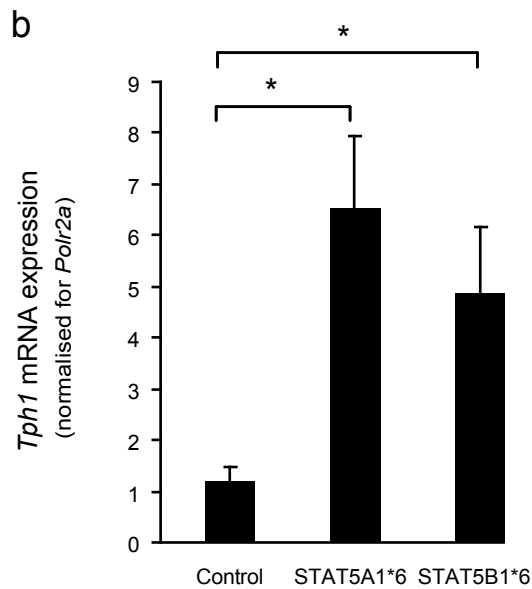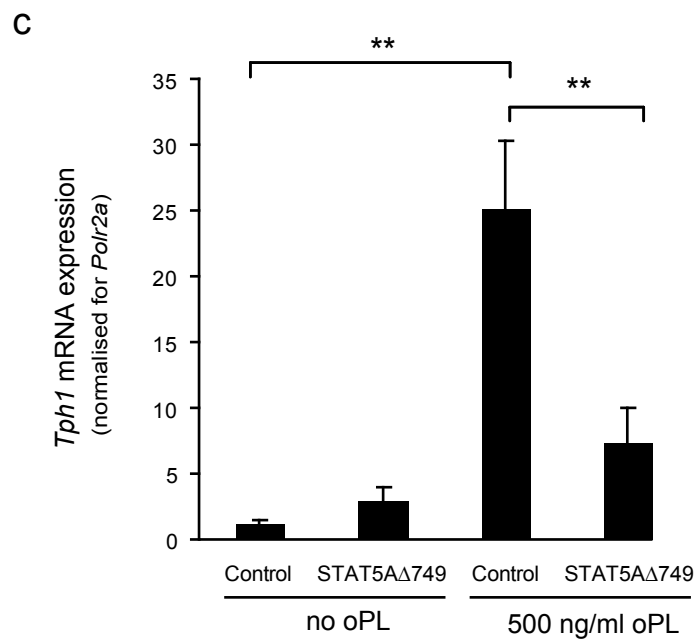

Supplement: 125_2010_1913_MOESM7_ESM.pdf [file 125_2010_1913_MOESM7_ESM.pdf]

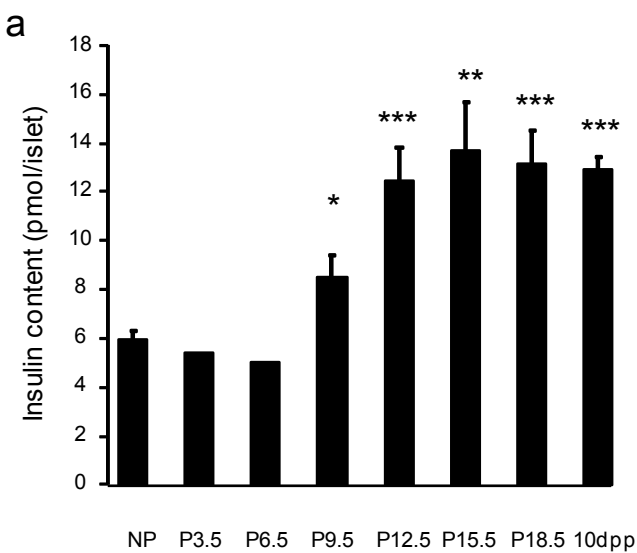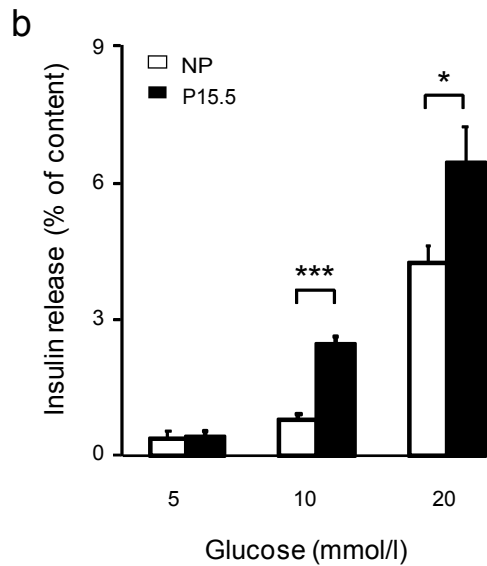

**c** □ Insulin ■ Serotonin

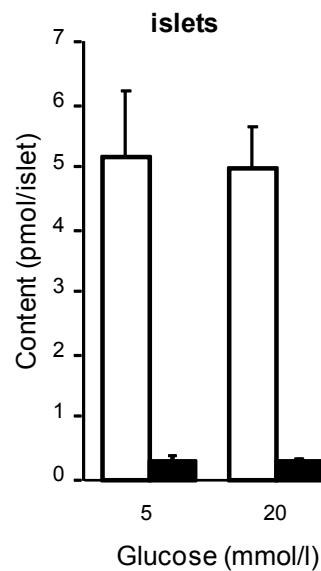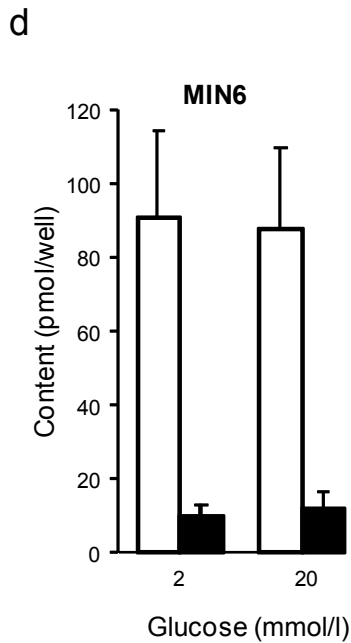

Supplement: 125_2010_1913_MOESM8_ESM.pdf [file 125_2010_1913_MOESM8_ESM.pdf]

0 ng/ml oPL

Hoechst  
Serotonin

50  $\mu$ m

100 ng/ml oPL

50  $\mu$ m

25 ng/ml oPL

50  $\mu$ m

500 ng/ml oPL

50  $\mu$ m

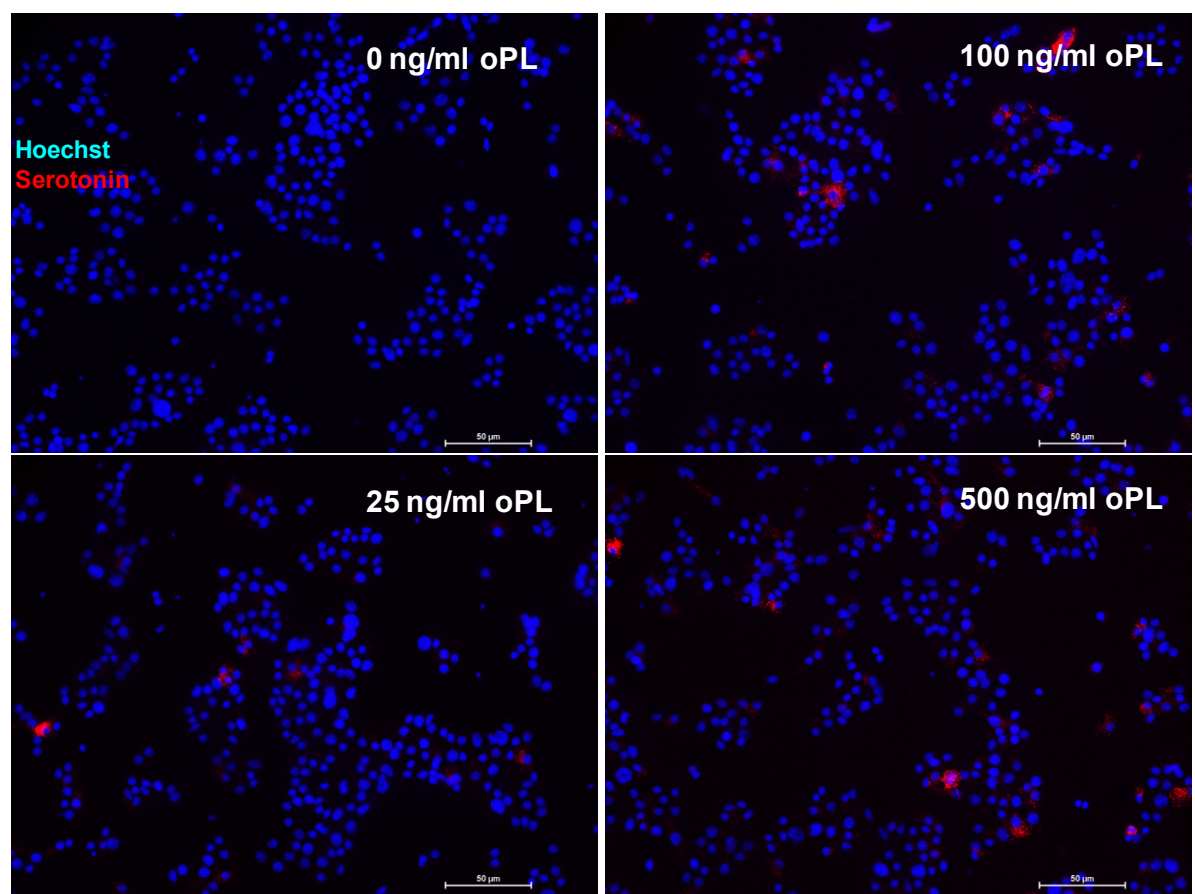

Supplement: 125_2010_1913_MOESM9_ESM.pdf [file 125_2010_1913_MOESM9_ESM.pdf]
